# Supplementary material for: Using confined carbonate crystals for the fabrication of nanosized metal oxide@carbon with superior lithium storage capacity
Source: Royal Society of Chemistry journal article supplement (doi:10.1039/c6ta05693h), 2016-01-01
Supplement: c6ta05693h1.pdf [file c6ta05693h1.pdf]

## Supporting Information

### Using confined carbonate crystals for the fabrication of nanosize metal oxide@carbon with superior lithium storage capacity

Fei Cheng, Wen-Cui Li, An-Hui Lu\*

State Key Laboratory of Fine Chemicals, School of Chemical Engineering, Dalian University of Technology, Dalian 116024, P. R. China

Corresponding Author: An-Hui Lu

\*E-mail: anhuilu@dlut.edu.cn Phone/ fax numbers: +86-0411-84986112

#### Calculation of the volume expansion ratio (R).

Parameters used in the calculation model of the volume change in manganese oxide@C anode.

| Component         | $\rho$ , Density<br>(g cm <sup>-3</sup> ) | M <sub>w</sub> , Molecular<br>weight (g mol <sup>-1</sup> ) |
|-------------------|-------------------------------------------|-------------------------------------------------------------|
| MnCO <sub>3</sub> | 3.125                                     | 114.95                                                      |
| MnO               | 5.45                                      | 70.94                                                       |
| Li <sub>2</sub> O | 2.013                                     | 29.88                                                       |
| Mn                | 7.44                                      | 54.94                                                       |

The theoretical volume expansion ratio (R) of MnO is calculated using the following equation:

$$R = \frac{V_{Li_2O} + V_{Mn}}{V_{MnO}} = \frac{\frac{M_{Li_2O}}{\rho_{Li_2O}} + \frac{M_{Mn}}{\rho_{Mn}}}{\frac{M_{MnO}}{\rho_{MnO}}}$$

$$R = \frac{\frac{29.88}{2.013} + \frac{54.938}{7.44}}{\frac{70.94}{5.45}} \times 100\% = 171\%$$

The volume expansion ratio (R) that this structure can tolerate is calculated using the following equation:

$$R = \frac{V_{MnCO_3}}{V_{MnO}} = \frac{V_{MnCO_3}}{\frac{n_{MnO} \times M_{MnO}}{\rho_{MnO}}} = \frac{V_{MnCO_3} \times \rho_{MnO}}{\frac{m_{MnCO_3}}{M_{MnCO_3}} \times M_{MnO}} = \frac{M_{MnCO_3} \times \rho_{MnO}}{M_{MnO} \times \rho_{MnCO_3}}$$

$$R = \frac{114.95 \times 5.45}{70.94 \times 3.125} \times 100\% = 282\%$$

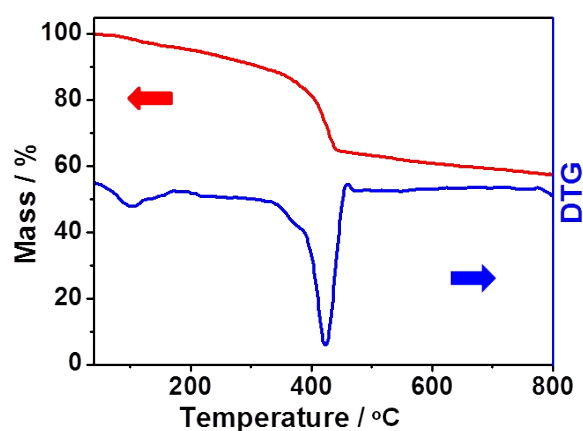

Fig. S1 TGA curve of the  $MnCO_3$  cube after coating with a polymer layer produced from a dopamine precursor ( $MnCO_3@polymer$ ). The measurement was conducted at a heating rate of  $10\text{ }^{\circ}\text{C min}^{-1}$  in a nitrogen flow.

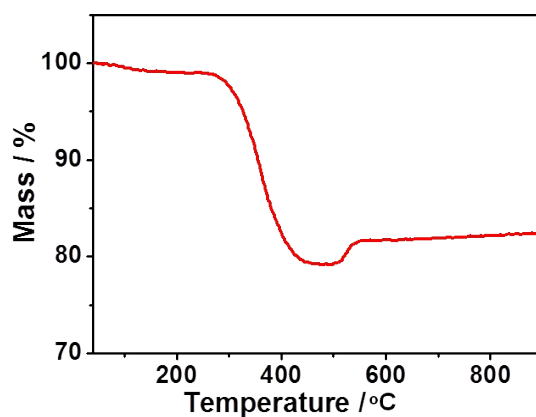

Fig. S2 TGA curve of the  $MnO@C$  hybrid. The measurement was conducted at a heating rate of  $10\text{ }^{\circ}\text{C min}^{-1}$  in an air flow.

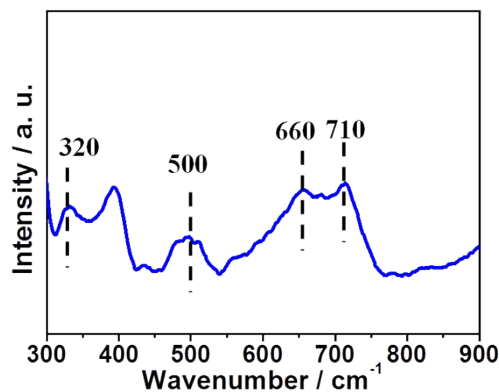

Fig. S3 Raman spectrum of the  $\text{Fe}_3\text{O}_4/\gamma\text{-Fe}_2\text{O}_3@\text{C}$  hybrid. One can see the peaks at  $\sim 660$  and  $320\text{ cm}^{-1}$  corresponding to the stoichiometric  $\text{Fe}_3\text{O}_4$ . The peaks at  $\sim 500$  and  $710\text{ cm}^{-1}$  can be ascribed to  $\gamma\text{-Fe}_2\text{O}_3$ .

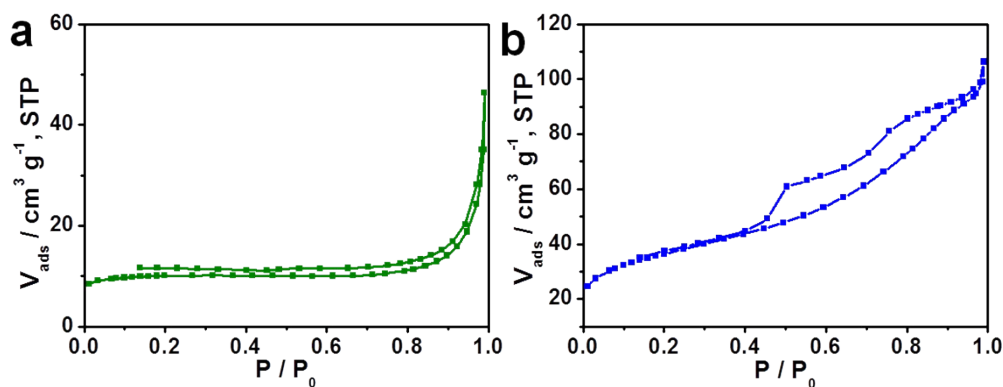

Fig. S4 (a)  $\text{N}_2$  adsorption–desorption isotherm of the  $\text{CoO}/\text{Co}_3\text{O}_4@\text{C}$  hybrid, (b)  $\text{N}_2$  adsorption–desorption isotherm of the  $\text{Fe}_3\text{O}_4/\gamma\text{-Fe}_2\text{O}_3@\text{C}$  hybrid.

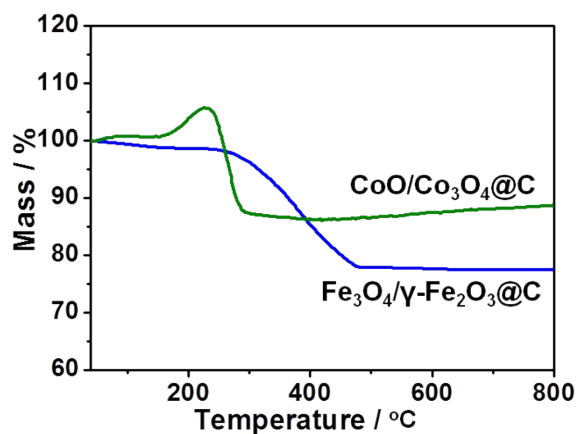

Fig. S5 TGA curves of the  $\text{CoO}/\text{Co}_3\text{O}_4@\text{C}$  and  $\text{Fe}_3\text{O}_4/\gamma\text{-Fe}_2\text{O}_3@\text{C}$  hybrids. The measurements were conducted at a heating rate of  $10\text{ }^\circ\text{C min}^{-1}$  in an air flow.

**Table S1.** The reported performances of MnO@C anodes for LIBs and the result in this study.

| Sample                                  | Initial coulombic efficiency   | Cycle number | Capacity at 0.2 A g <sup>-1</sup> (mA h g <sup>-1</sup> ) | Rate capacity (mA h g <sup>-1</sup> )   | Ref        |
|-----------------------------------------|--------------------------------|--------------|-----------------------------------------------------------|-----------------------------------------|------------|
| Mesoporous MnO@C cube                   | 71% (0.2 A g <sup>-1</sup> )   | 200          | 886                                                       | 770 (2 A g <sup>-1</sup> ) (300 cycles) | This study |
| GNs/MnO nanowires                       | 60.5% (0.1 A g <sup>-1</sup> ) | 200          | 723                                                       | 285 (2.5 A g <sup>-1</sup> )            | 9          |
| Hollow porous MnO/C microsphere         | 71% (0.1 A g <sup>-1</sup> )   | 50           | 600                                                       | 315 (3 A g <sup>-1</sup> )              | 10         |
| MnO/C nanorod                           | 54.9% (0.1 A g <sup>-1</sup> ) | 100          | 721                                                       | 371 (1.6 A g <sup>-1</sup> )            | 26         |
| Microparticulate porous MnO@C           | 56% (0.1 A g <sup>-1</sup> )   | 100          | 479                                                       | 238 (0.8 A g <sup>-1</sup> )            | 29         |
| Nanosize MnO dispersed spherical carbon | 76.5% (0.5 A g <sup>-1</sup> ) | 300          | 676                                                       | 287 (2 A g <sup>-1</sup> )              | 30         |
| MnO/C microsheets                       | 62.9% (0.1 A g <sup>-1</sup> ) | 50           | 598                                                       | 323 (2 A g <sup>-1</sup> )              | 31         |
| Tube-like MnO/C                         | 61.5% (0.2 A g <sup>-1</sup> ) | 60           | 610                                                       | 350 (2 A g <sup>-1</sup> )              | 33         |
